# Supplementary material for: Associations of the inflammatory diet index and smoking status with the risk of chronic obstructive pulmonary disease and lung cancer
Source: Royal Society of Chemistry journal article supplement (doi:10.1039/d2fo03429h), 2023-01-01
Supplement: d2fo03429h1.pdf [file d2fo03429h1.pdf]

Supplementary Table S1 Food groups for the dietary inflammatory potential score among participants with one 24-h dietary assessment.

| <b>Products</b>                               | <b>Spearman correlation coefficients<sup>a</sup></b> | <b>Weights<sup>b</sup></b> |
|-----------------------------------------------|------------------------------------------------------|----------------------------|
| <b>Foods with anti-inflammatory potential</b> |                                                      |                            |
| Nut                                           | -0.265161                                            | -0.003010                  |
| Vegetarianalter                               | -0.176740                                            | -0.000829                  |
| Starchy                                       | -0.293699                                            | -0.000784                  |
| Breakfast                                     | -0.283399                                            | -0.000768                  |
| Cheese                                        | -0.132606                                            | -0.000675                  |
| Dessert                                       | -0.019741                                            | -0.000364                  |
| Fish                                          | -0.151265                                            | -0.000319                  |
| Wine                                          | -0.147819                                            | -0.000269                  |
| Bread                                         | -0.000368                                            | -0.000240                  |
| Fruit                                         | -0.248116                                            | -0.000181                  |
| Pastry                                        | -0.006983                                            | -0.000170                  |
| Vegetable                                     | -0.177558                                            | -0.000120                  |
| Soup                                          | -0.046181                                            | 0.000076                   |
| Tea                                           | -0.122876                                            | -0.000034                  |
| Juice                                         | -0.022787                                            | -0.000033                  |
| Coffee                                        | -0.026673                                            | -0.000020                  |
| <b>Foods with pro-inflammatory potential</b>  |                                                      |                            |
| Butter                                        | 0.109284                                             | 0.002350                   |
| Organ                                         | 0.072014                                             | 0.002040                   |
| Other alcohol                                 | 0.171705                                             | 0.002030                   |
| Processed meat                                | 0.298466                                             | 0.002000                   |
| Red meat                                      | 0.304597                                             | 0.001310                   |
| Other meat                                    | 0.034884                                             | 0.000938                   |
| Ice cream                                     | 0.129346                                             | 0.000690                   |
| Poultry                                       | 0.111422                                             | 0.000643                   |
| Chocolate drink                               | 0.061311                                             | 0.000369                   |
| Low-calorie drink                             | 0.347624                                             | 0.000353                   |
| Milk                                          | 0.106044                                             | 0.000318                   |
| Egg                                           | 0.067756                                             | 0.000315                   |
| Potato                                        | 0.238159                                             | 0.000311                   |
| Snack                                         | 0.067147                                             | 0.000280                   |
| Sweets                                        | 0.066560                                             | 0.000271                   |
| High energy drink                             | 0.220717                                             | 0.000242                   |
| Smoothie                                      | 0.011800                                             | 0.000141                   |
| Beer                                          | 0.135685                                             | 0.000026                   |

<sup>a</sup> Derived by reduced rank regression analysis with C reactive protein as the response variable. <sup>b</sup> Weights are regression coefficients derived from the final step of the stepwise linear regression models. Each weight represents the contribution of the food groups to the dietary inflammatory potential score.

Supplementary Table S2 Hazards ratios (HRs) and 95% confidence interval (CIs) of chronic obstructive pulmonary disease and lung cancer by joint exposures of the dietary inflammatory index and smoking status: results from Cox regression models.

| Inflammatory Diet Index | Smoking Status | COPD                     |                          | Lung cancer              |                          |
|-------------------------|----------------|--------------------------|--------------------------|--------------------------|--------------------------|
|                         |                | HR (95% CI) <sup>a</sup> | HR (95% CI) <sup>b</sup> | HR (95% CI) <sup>a</sup> | HR (95% CI) <sup>b</sup> |
| Highest                 | Yes            | Ref.                     | Ref.                     |                          |                          |
| Lowest+Middle           | Yes            | 0.54 (0.51, 0.58)        | 0.63 (0.58, 0.67)        | 0.62 (0.54, 0.71)        | 0.65 (0.57, 0.75)        |
| Highest                 | No             | 0.21 (0.19, 0.24)        | 0.23 (0.21, 0.26)        | 0.15 (0.11, 0.20)        | 0.16 (0.12, 0.21)        |
| Lowest+Middle           | No             | 0.15 (0.14, 0.17)        | 0.19 (0.17, 0.21)        | 0.17 (0.14, 0.21)        | 0.19 (0.16, 0.23)        |

Abbreviation: HR, hazard ratio; 95% CI, 95% confidence interval; COPD, chronic obstructive pulmonary disease.

<sup>a</sup> Cox Model adjusted for age and sex;

<sup>b</sup> Cox Model adjusted for age, sex, education, ethnicity, Townsend deprivation index, energy intake, body mass index, total physical activity, PM2.5, hypertension, hyperglycemia, CVD, and asthma.

Measures of additive interaction for COPD:

Relative excess risk due to interaction: 1.736, 95% CI 1.397–2.101; Attributable proportion: 0.331, 95% CI 0.274–0.383; Synergy index: 1.692, 95% CI 1.510–1.896.

Measures of additive interaction for lung cancer:

Relative excess risk due to interaction: 0.263, 95% CI -0.013–0.575; Attributable proportion: 0.082, 95% CI -0.004–0.156; Synergy index: 1.135, 95% CI 0.998–1.292.

Supplementary Table S3 Hazards ratios (HRs) and 95% confidence interval (CIs) of chronic obstructive pulmonary disease and lung cancer by joint exposures of the dietary inflammatory index and smoking status by age.

| Inflammatory Diet Index  | Smoking Status | COPD                     |                          | Lung cancer              |                          |
|--------------------------|----------------|--------------------------|--------------------------|--------------------------|--------------------------|
|                          |                | HR (95% CI) <sup>a</sup> | HR (95% CI) <sup>b</sup> | HR (95% CI) <sup>a</sup> | HR (95% CI) <sup>b</sup> |
| <b>&lt; 60 years old</b> |                |                          |                          |                          |                          |
| Highest                  | Yes            | Ref.                     | Ref.                     | Ref.                     | Ref.                     |
| Lowest+Middle            | Yes            | 0.53 (0.47, 0.60)        | 0.65 (0.58, 0.74)        | 0.59 (0.46, 0.75)        | 0.61 (0.48, 0.78)        |
| Highest                  | No             | 0.19 (0.15, 0.22)        | 0.21 (0.17, 0.25)        | 0.12 (0.08, 0.19)        | 0.13 (0.08, 0.20)        |
| Lowest+Middle            | No             | 0.15 (0.12, 0.17)        | 0.20 (0.17, 0.24)        | 0.18 (0.14, 0.25)        | 0.20 (0.15, 0.27)        |
| <b>≥ 60 years old</b>    |                |                          |                          |                          |                          |
| Highest                  | Yes            | Ref.                     | Ref.                     | Ref.                     | Ref.                     |
| Lowest+Middle            | Yes            | 0.56 (0.52, 0.61)        | 0.63 (0.58, 0.69)        | 0.65 (0.55, 0.77)        | 0.70 (0.59, 0.83)        |
| Highest                  | No             | 0.22 (0.19, 0.25)        | 0.24 (0.21, 0.28)        | 0.16 (0.12, 0.23)        | 0.18 (0.13, 0.25)        |
| Lowest+Middle            | No             | 0.15 (0.13, 0.17)        | 0.19 (0.16, 0.21)        | 0.16 (0.13, 0.20)        | 0.18 (0.14, 0.24)        |

Abbreviation: COPD, chronic obstructive pulmonary disease.

<sup>a</sup> Cox Model adjusted for sex;

<sup>b</sup> Cox Model adjusted for sex, education, ethnicity, Townsend deprivation index, energy intake, smoking status, body mass index, total physical activity, PM2.5, hypertension, hyperglycemia, CVD, and asthma.

Supplementary Table S4 Hazards ratios (HRs) and 95% confidence interval (CIs) of chronic obstructive pulmonary disease and lung cancer by joint exposures of the dietary inflammatory index and smoking status by sex.

| Inflammatory Diet Index | Smoking Status | COPD                     |                          | Lung cancer              |                          |
|-------------------------|----------------|--------------------------|--------------------------|--------------------------|--------------------------|
|                         |                | HR (95% CI) <sup>a</sup> | HR (95% CI) <sup>b</sup> | HR (95% CI) <sup>a</sup> | HR (95% CI) <sup>b</sup> |
| <b>Women</b>            |                |                          |                          |                          |                          |
| Highest                 | Yes            | Ref.                     | Ref.                     | Ref.                     | Ref.                     |
| Lowest+Middle           | Yes            | 0.56 (0.50, 0.62)        | 0.66 (0.59, 0.74)        | 0.74 (0.60, 0.91)        | 0.77 (0.62, 0.95)        |
| Highest                 | No             | 0.23 (0.19, 0.27)        | 0.25 (0.21, 0.30)        | 0.16 (0.11, 0.23)        | 0.16 (0.11, 0.24)        |
| Lowest+Middle           | No             | 0.17 (0.15, 0.19)        | 0.21 (0.18, 0.24)        | 0.21 (0.16, 0.27)        | 0.22 (0.17, 0.29)        |
| <b>Men</b>              |                |                          |                          |                          |                          |
| Highest                 | Yes            | Ref.                     | Ref.                     | Ref.                     | Ref.                     |
| Lowest+Middle           | Yes            | 0.54 (0.49, 0.59)        | 0.61 (0.55, 0.67)        | 0.54 (0.45, 0.65)        | 0.58 (0.48, 0.70)        |
| Highest                 | No             | 0.20 (0.17, 0.23)        | 0.22 (0.19, 0.26)        | 0.15 (0.11, 0.22)        | 0.17 (0.12, 0.25)        |
| Lowest+Middle           | No             | 0.13 (0.12, 0.15)        | 0.17 (0.15, 0.20)        | 0.14 (0.10, 0.19)        | 0.16 (0.12, 0.22)        |

Abbreviation: COPD, chronic obstructive pulmonary disease.

<sup>a</sup> Cox Model adjusted for age;

<sup>b</sup> Cox Model adjusted for age, education, ethnicity, Townsend deprivation index, energy intake, smoking status, body mass index, total physical activity, PM2.5, hypertension, hyperglycemia, CVD, and asthma.

Supplementary Table S5 Hazards ratios (HRs) and 95% confidence interval (CIs) of chronic obstructive pulmonary disease and lung cancer by joint exposures of the dietary inflammatory index and smoking status after excluding missing values for covariates.

| Inflammatory Diet Index | Smoking Status | COPD                     |                          | Lung cancer              |                          |
|-------------------------|----------------|--------------------------|--------------------------|--------------------------|--------------------------|
|                         |                | HR (95% CI) <sup>a</sup> | HR (95% CI) <sup>b</sup> | HR (95% CI) <sup>a</sup> | HR (95% CI) <sup>b</sup> |
| Highest                 | Yes            | Ref.                     | Ref.                     | Ref.                     | Ref.                     |
| Lowest+Middle           | Yes            | 0.56 (0.52, 0.60)        | 0.64 (0.59, 0.69)        | 0.62 (0.54, 0.72)        | 0.66 (0.57, 0.76)        |
| Highest                 | No             | 0.22 (0.19, 0.25)        | 0.24 (0.21, 0.27)        | 0.14 (0.11, 0.19)        | 0.15 (0.11, 0.21)        |
| Lowest+Middle           | No             | 0.15 (0.14, 0.17)        | 0.19 (0.17, 0.21)        | 0.17 (0.14, 0.21)        | 0.19 (0.16, 0.23)        |

Abbreviation: COPD, chronic obstructive pulmonary disease.

<sup>a</sup> Cox Model adjusted for age and sex;

<sup>b</sup> Cox Model adjusted for age, sex, education, ethnicity, Townsend deprivation index, energy intake, smoking status, body mass index, total physical activity, PM2.5, hypertension, hyperglycemia, CVD, and asthma.

Supplementary Table S6 Hazards ratios (HRs) and 95% confidence interval (CIs) of chronic obstructive pulmonary disease and lung cancer by joint exposures of the dietary inflammatory index and smoking status after exclusion of diseases outcome occurring during the first 2 years of follow-up in the UK Biobank cohort.

| Inflammatory<br>Diet Index | Smoking<br>Status | COPD                     |                          | Lung cancer              |                          |
|----------------------------|-------------------|--------------------------|--------------------------|--------------------------|--------------------------|
|                            |                   | HR (95% CI) <sup>a</sup> | HR (95% CI) <sup>b</sup> | HR (95% CI) <sup>a</sup> | HR (95% CI) <sup>b</sup> |
| Highest                    | Yes               | Ref.                     | Ref.                     | Ref.                     | Ref.                     |
| Lowest+Middle              | Yes               | 0.55 (0.51, 0.59)        | 0.63 (0.58, 0.68)        | 0.60 (0.52, 0.69)        | 0.63 (0.55, 0.73)        |
| Highest                    | No                | 0.21 (0.19, 0.24)        | 0.23 (0.21, 0.26)        | 0.15 (0.11, 0.19)        | 0.16 (0.12, 0.21)        |
| Lowest+Middle              | No                | 0.15 (0.14, 0.17)        | 0.19 (0.17, 0.21)        | 0.16 (0.14, 0.20)        | 0.18 (0.15, 0.22)        |

Abbreviation: COPD, chronic obstructive pulmonary disease.

<sup>a</sup> Cox Model adjusted for age and sex;

<sup>b</sup> Cox Model adjusted for age, sex, education, ethnicity, Townsend deprivation index, energy intake, smoking status, body mass index, total physical activity, PM2.5, hypertension, hyperglycemia, CVD, and asthma.

Supplementary Table S7 Hazards ratios (HRs) and 95% confidence interval (CIs) of chronic obstructive pulmonary disease and lung cancer by joint exposures of the dietary inflammatory index and smoking status after excluding participants with FEV<sub>1</sub>/FVC ratio < 0.7 at baseline.

| Inflammatory Diet Index | Smoking Status | COPD                     |                          | Lung cancer              |                          |
|-------------------------|----------------|--------------------------|--------------------------|--------------------------|--------------------------|
|                         |                | HR (95% CI) <sup>a</sup> | HR (95% CI) <sup>b</sup> | HR (95% CI) <sup>a</sup> | HR (95% CI) <sup>b</sup> |
| Highest                 | Yes            | Ref.                     | Ref.                     | Ref.                     | Ref.                     |
| Lowest+Middle           | Yes            | 0.52 (0.46, 0.58)        | 0.64 (0.57, 0.73)        | 0.63 (0.51, 0.78)        | 0.68 (0.55, 0.84)        |
| Highest                 | No             | 0.27 (0.23, 0.32)        | 0.31 (0.26, 0.36)        | 0.19 (0.14, 0.28)        | 0.21 (0.15, 0.30)        |
| Lowest+Middle           | No             | 0.19 (0.16, 0.22)        | 0.27 (0.23, 0.32)        | 0.23 (0.18, 0.30)        | 0.26 (0.20, 0.34)        |

Abbreviation: COPD, chronic obstructive pulmonary disease.

<sup>a</sup> Cox Model adjusted for age and sex;

<sup>b</sup> Cox Model adjusted for age, sex, education, ethnicity, Townsend deprivation index, energy intake, smoking status, body mass index, total physical activity, PM2.5, hypertension, hyperglycemia, CVD, and asthma.

Supplementary Table S8 Food groups for the dietary inflammatory potential score among participants with at least two 24-h dietary assessments (n=103,482).

| <b>Products</b>                               | <b>Spearman correlation coefficients</b> | <b>Weights</b> |
|-----------------------------------------------|------------------------------------------|----------------|
| <b>Foods with anti-inflammatory potential</b> |                                          |                |
| Nut                                           | -0.298750                                | -0.001600      |
| Vegetarianalter                               | -0.214305                                | -0.000522      |
| Breakfast                                     | -0.282494                                | -0.000409      |
| Starchy                                       | -0.345552                                | -0.000370      |
| Cheese                                        | -0.166188                                | -0.000281      |
| Fish                                          | -0.193180                                | -0.000186      |
| Wine                                          | -0.225753                                | -0.000176      |
| Dessert                                       | -0.075847                                | -0.000164      |
| Fruit                                         | -0.287302                                | -0.000108      |
| Pastry                                        | -0.061430                                | -0.000097      |
| Vegetable                                     | -0.254480                                | -0.000091      |
| Bread                                         | -0.055622                                | -0.000079      |
| Other drink                                   | -0.043699                                | -0.000074      |
| Bean                                          | -0.071777                                | -0.000068      |
| Tea                                           | -0.147130                                | -0.000034      |
| Juice                                         | -0.065465                                | -0.000029      |
| Coffee                                        | -0.016277                                | -0.000024      |
| <b>Foods with pro-inflammatory potential</b>  |                                          |                |
| Other alcohol                                 | 0.130749                                 | 0.001070       |
| Organ                                         | 0.061166                                 | 0.000887       |
| Processed meat                                | 0.216724                                 | 0.000772       |
| Butter                                        | 0.086403                                 | 0.000648       |
| Red meat                                      | 0.215542                                 | 0.000540       |
| Ice cream                                     | 0.085049                                 | 0.000305       |
| Egg                                           | 0.067436                                 | 0.000289       |
| Other meat                                    | 0.004167                                 | 0.000255       |
| Poultry                                       | 0.059581                                 | 0.000255       |
| Sweet                                         | 0.037575                                 | 0.000229       |
| Chocolater drink                              | 0.054653                                 | 0.000223       |
| Low calorie drink                             | 0.316223                                 | 0.000215       |
| Snack                                         | 0.005649                                 | 0.000204       |
| Milk                                          | 0.104605                                 | 0.000195       |
| High energy drink                             | 0.191558                                 | 0.000130       |
| Potato                                        | 0.118269                                 | 0.000126       |
| Smoothie                                      | -0.004418                                | 0.000055       |



Supplementary Table S9 Hazards ratios (HRs) and 95% confidence interval (CIs) of chronic obstructive pulmonary disease and lung cancer by joint exposures of dietary inflammatory index and smoking status via mean intakes using at least two 24-h dietary assessments.

| Inflammatory Diet Index | Smoking Status | COPD                     |                          | Lung cancer              |                          |
|-------------------------|----------------|--------------------------|--------------------------|--------------------------|--------------------------|
|                         |                | HR (95% CI) <sup>a</sup> | HR (95% CI) <sup>b</sup> | HR (95% CI) <sup>a</sup> | HR (95% CI) <sup>b</sup> |
| Highest                 | Yes            | Ref.                     | Ref.                     | Ref.                     | Ref.                     |
| Lowest+Middle           | Yes            | 0.58 (0.52, 0.63)        | 0.65 (0.59, 0.71)        | 0.71 (0.59, 0.85)        | 0.74 (0.62, 0.90)        |
| Highest                 | No             | 0.25 (0.22, 0.29)        | 0.27 (0.24, 0.32)        | 0.17 (0.12, 0.24)        | 0.18 (0.12, 0.25)        |
| Lowest+Middle           | No             | 0.15 (0.13, 0.17)        | 0.19 (0.16, 0.21)        | 0.19 (0.15, 0.24)        | 0.21 (0.16, 0.27)        |

Abbreviation: COPD, chronic obstructive pulmonary disease.

<sup>a</sup> Cox Model adjusted for age and sex;

<sup>b</sup> Cox Model adjusted for age, sex, education, ethnicity, Townsend deprivation index, energy intake, smoking status, body mass index, total physical activity, PM2.5, hypertension, hyperglycemia, CVD, and asthma.

Supplementary Table S10 Hazards ratios (HRs) and 95% confidence interval (CIs) of chronic obstructive pulmonary disease and lung cancer by the dietary inflammatory index stratified by the number of cigarettes per day.

| Inflammatory Diet Index | COPD              |                | Lung cancer       |                |
|-------------------------|-------------------|----------------|-------------------|----------------|
|                         | HR (95% CI)       | <i>P</i> Value | HR (95% CI)       | <i>P</i> Value |
| 0 cigarette/day         |                   |                |                   |                |
| Highest                 | Ref.              | Ref.           | Ref.              | Ref.           |
| Middle                  | 1.09 (0.92, 1.29) | 0.327          | 1.06 (0.77, 1.45) | 0.737          |
| Lowest                  | 1.23 (1.04, 1.45) | 0.018          | 0.84 (0.59, 1.19) | 0.322          |
| 0-10 cigarettes/day     |                   |                |                   |                |
| Highest                 | Ref.              | Ref.           | Ref.              | Ref.           |
| Middle                  | 1.24 (0.89, 1.72) | 0.215          | 1.67 (0.95, 2.94) | 0.075          |
| Lowest                  | 1.65 (1.20, 2.27) | 0.002          | 1.78 (1.01, 3.15) | 0.048          |
| ≥10 cigarettes/day      |                   |                |                   |                |
| Highest                 | Ref.              | Ref.           | Ref.              | Ref.           |
| Middle                  | 1.25 (1.12, 1.39) | <0.001         | 1.16 (0.95, 1.43) | 0.140          |
| Lowest                  | 1.84 (1.67, 2.03) | <0.001         | 1.71 (1.42, 2.07) | <0.001         |

Abbreviation: COPD, chronic obstructive pulmonary disease. All participants were divided into three groups based on the tertile distribution of the number of cigarettes per day. Cox Model adjusted for age, education, ethnicity, Townsend deprivation index, energy intake, body mass index, total physical activity, PM<sub>2.5</sub>, hypertension, hyperglycemia, CVD, and asthma.

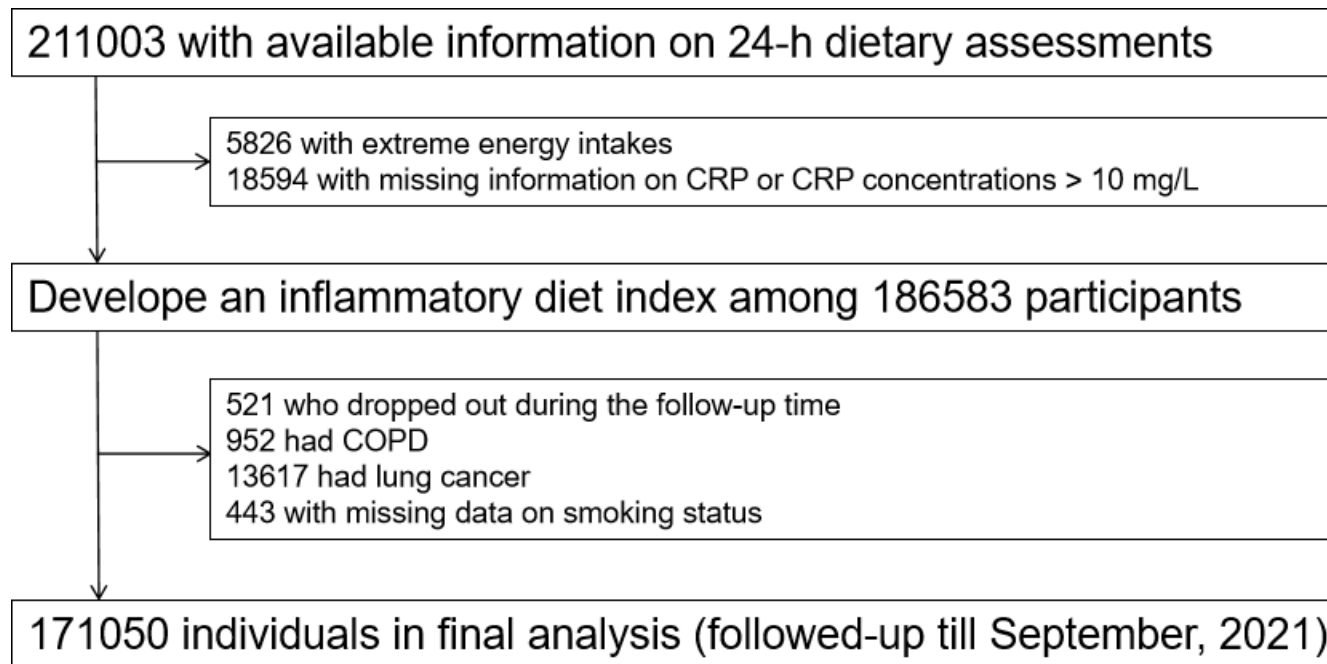

Figure S1. Flowchart of the study population.

Abbreviation: CRP, C reactive protein; COPD, chronic obstructive pulmonary disease
